1 **Shared Genomic Architectures of COVID-19 and Antisocial Behavior**

2 **Running title: COVID-19 and Antisocial Behavior**

3  
4 **Authors**

5 Charleen D. Adams, PhD MPH<sup>1\*</sup>, Jorim J. Tielbeek, PhD<sup>2</sup>, Brian B. Boutwell, PhD<sup>3,4</sup>

6 <sup>1</sup>Department of Environmental Health, Program in Molecular and Integrative Physiological Sciences,

7 Harvard T.H. Chan School of Public Health;<sup>2</sup>Department of Complex Trait Genetics, Center for

8 Neurogenomics and Cognitive Research, Amsterdam Neuroscience, Vrije Universiteit Amsterdam,

9 Amsterdam, Netherlands;<sup>3</sup>School of Applied Sciences, The University of Mississippi; <sup>4</sup>John D. Bower

10 School of Population Health, University of Mississippi Medical Center

11 Correspondence to:

12 \*Department of Environmental Health, Program in Molecular and Integrative Physiological Sciences,

13 Harvard T.H. Chan School of Public Health, Boston, Massachusetts 02115, USA; Tel.: 626-841-3937;

14 Email: [cdadams@hsph.harvard.edu](mailto:cdadams@hsph.harvard.edu).

15 Word count, manuscript: 1998; word count Abstract: 228

29 **Abstract**

30

31 Little is known about the genetics of norm violation and aggression (ASB) in relation to coronavirus  
32 disease 2019 (COVID-19). To investigate this, we used summary statistics from genome-wide  
33 association studies and linkage disequilibrium score regression to calculate a matrix of genetic  
34 correlations ( $r_{gs}$ ) for ASB, COVID-19, and various health and behavioral traits. After false-discovery  
35 rate correction, ASB was genetically correlated with COVID-19 ( $r_g = 0.51$ ;  $P = 1.54E-02$ ) and 19 other  
36 traits. ASB and COVID-19 were both positively genetically correlated with having a noisy workplace,  
37 doing heavy manual labor, chronic obstructive pulmonary disease, and genitourinary diseases. ASB  
38 and COVID-19 were both inversely genetically correlated with average income, education years,  
39 healthspan, verbal reasoning, lifespan, cheese intake, and being breastfed as a baby. But keep in mind  
40 that  $r_{gs}$  are not necessarily causal. And, if causal, their prevailing directions of effect (which causes  
41 which) are indiscernible from  $r_{gs}$  alone. Moreover, the SNP-heritability ( $h_g^2$ ) estimates for both  
42 measures of COVID-19 were very low, restricting the overlap of genetic variance in absolute terms  
43 between the two traits. Nonetheless, our findings suggest that those with antisocial tendencies possibly  
44 have a higher risk of exposure to severe acute respiratory syndrome coronavirus 2 (SARS-CoV-2) than  
45 those without antisocial tendencies. This may have been especially true early in the pandemic before  
46 vaccines against SARS-CoV-2 were available and before the emergence of the highly transmissible  
47 Omicron variant.

48

49

50

51

## 52 **Introduction**

53 Antisocial behavior (ASB)— including aggression, rule-breaking, delinquency, and violence—  
54 are harmful to society. ASB creates a long wake of monetary, social, and emotional disturbances for  
55 countries, communities, and individuals<sup>1,2</sup>. Especially troublesome are the possible effects during  
56 pandemics. For instance, ASB may abet pandemic spread. Those engaged in overt ASB seem to adhere  
57 less to coronavirus disease 2019 (COVID-19) containment measures<sup>3-5</sup>. Similarly, individuals scoring  
58 higher on less obvious indicators of antisociality (i.e., low acceptance of moral rules, higher levels of  
59 psychopathy, “pre-pandemic legal cynicism, low shame/guilt, low self-control, engagement in  
60 delinquent behaviors, and association with delinquent peers”) have shown evidence of disregarding  
61 public-health guidelines<sup>3,4,6</sup>. This warrants further investigation into the possible connections between  
62 ASB and exposure to severe acute respiratory syndrome coronavirus 2 (SARS-CoV-2), the virus that  
63 causes COVID-19.

64 Complicating causal inference concerning the links between of ASB and pandemic-relevant  
65 outcomes is that about half of the variance in ASB and, to varying degrees, associated traits, is  
66 heritable<sup>7-9</sup>. This matters because the extent to which ASB and other traits share genetic architecture  
67 could influence the likelihood of genetic confounding in observational studies. Broadly addressing this  
68 problem is a nascent area of research that uses genome-wide association (GWA) studies of ASB and  
69 various health and behavioral traits to calculate genetic correlations ( $r_{gs}$ )<sup>10</sup>. These studies have revealed  
70  $r_{gs}$  between ASB and most psychiatric, psychological, reproductive, cognitive, and addictive traits<sup>11,12</sup>.  
71 In addition, those prone to antisocial, violent, and criminal behaviors are disproportionately and  
72 profoundly unhealthy<sup>13,14</sup>. A strongly negative genetic correlation ( $r_g = -0.55$ ) between ASB and self-  
73 reported health has been reported<sup>11</sup>. In contrast, a comprehensive study found no significant  $r_{gs}$   
74 between ASB and 669 health, physiological, and well-being measures after accounting for multiple

75 testing<sup>15</sup>. Thus, much remains to be discovered regarding shared etiology between ASB and various  
76 aspects of health, including COVID-19.

## 77 **Methods and materials**

78 We characterized the shared polygenic nature of ASB, COVID-19, and various health and  
79 behavioral traits using summary statistics from GWA studies and linkage disequilibrium score  
80 regression (LDSC; software available at <http://www.github.com/bulik/ldsc>)<sup>16</sup>. We calculated a matrix  
81 of  $r_{gs}$ . Of note is that correlation, even when genetic, is not necessarily causation. While our study can  
82 point to shared genetic architecture between traits, the reader should be cautious about assuming that  
83 the  $r_{gs}$  are causal. **Table 1** contains details about the GWA studies we used and where interested  
84 researchers can access them. Nineteen traits were chosen for novelty (having not been previously  
85 reported as either null or significantly correlated with ASB). The novel traits include: average income  
86 (before taxes); healthspan (i.e., living free from congestive heart failure, myocardial infarction, chronic  
87 obstructive pulmonary disease [COPD], stroke, dementia, diabetes, cancer, and death; coded as a  
88 protective ratio); parental lifespan (hereafter “lifespan”; coded as a protective ratio); word interpolation  
89 (hereafter “verbal reasoning”); having been breastfed as baby; cheese intake; self-reported happiness;  
90 having had COVID-19 (data from two GWA studies); doing heavy manual labor; having a noisy  
91 workplace; Townsend Deprivation Index (an area- and census-based measure of deprivation, where a  
92 higher score indicates more deprivation); having gastrointestinal diseases; having COPD; having  
93 genitourinary diseases; playing computer games; having been a violent-crime victim; risk tolerance,  
94 and witnessing a sudden violent death. Four traits (education years; seen doctor for nerves, anxiety,  
95 tension, or depression; neuroticism; and Parkinson's disease) were chosen as replicates of previously  
96 reported findings.

## 97 **Results**

98 **ASB**

99 After false-discovery rate (FDR)-correction ( $P < 0.05$ ), ASB was positively genetically  
100 correlated with COVID-19 (release 4):  $r_g = 0.51$ ;  $P = 1.54E-02$ . The  $r_g$  was also positive between ASB  
101 and COVID-19 (release 6) with marginal significance *prior* to FDR-correction but not after:  $r_{gs} = 0.35$ ;  
102  $P = 3.83E-02$  (FDR-corrected  $P = 5.21E-02$ ). The remaining (FDR-significant)  $r_{gs}$  between ASB and  
103 health and behavioral traits that were positive are as follows:

- 104 1. Townsend Deprivation Index ( $r_g = 0.70$ )
- 105 2. Noisy workplace ( $r_g = 0.63$ )
- 106 3. Heavy manual labor ( $r_g = 0.58$ )
- 107 4. COPD ( $r_g = 0.51$ )
- 108 5. Risk tolerance ( $r_g = 0.50$ )
- 109 6. Gastrointestinal diseases ( $r_g = 0.46$ )
- 110 7. Seen a doctor for nerves, anxiety, tension, or depression ( $r_g = 0.42$ )
- 111 8. Seen a sudden violent death ( $r_g = 0.42$ )
- 112 9. Genitourinary diseases ( $r_g = 0.38$ )
- 113 10. Being a violent-crime victim ( $r_g = 0.36$ )
- 114 11. Neuroticism ( $r_g = 0.29$ )
- 115 12. Playing computer games ( $r_g = 0.15$ )

116 ASB was negatively genetically correlated with seven traits (after FDR-correction):

- 117 1. Average income ( $r_g = -0.54$ )
- 118 2. Education years ( $r_g = -0.48$ )
- 119 3. Healthspan ( $r_g = -0.47$ )

120 4. Verbal reasoning ( $r_g = -0.44$ )

121 5. Lifespan ( $r_g = -0.33$ )

122 6. Cheese intake ( $r_g = -0.28$ )

123 7. Breastfed as baby ( $r_g = -0.24$ )

124 The  $r_{gs}$  for ASB and the health and behavioral traits are displayed in a forest plot in **Figure 1** and

125 presented in **Table 2** along with confidence intervals and SNP-heritability ( $h_g^2$ ) estimates. See the

126 Supplement for the results for all the  $r_{gs}$  in the matrix (Supplementary Table 1), including the  $p$ -values

127 before and after FDR-correction (Supplementary Table 2).

## 128 **COVID-19**

129 Due to the positive  $r_g$  between COVID-19 and ASB, we highlight the FDR-significant  $r_{gs}$

130 between COVID-19 and non-ASB traits. COVID-19 was positively genetically correlated with the

131 following:

132 1. COPD ( $r_g = 0.40$ ) -- COVID-19 (release 6)

133 2. COPD ( $r_g = 0.33$ ) -- COVID-19 (release 4)

134 3. Heavy manual labor ( $r_g = 0.38$ ) -- COVID-19 (release 6)

135 4. Heavy manual labor ( $r_g = 0.20$ ) -- COVID-19 (release 4)

136 5. Genitourinary diseases ( $r_g = 0.32$ ) -- COVID-19 (release 6)

137 6. Noisy workplace ( $r_g = 0.28$ ) -- COVID-19 (release 6)

138 7. Noisy workplace ( $r_g = 0.26$ ) -- COVID-19 (release 4)

139 COVID-19 was negatively genetically correlated with the following:

140 1. Cheese intake ( $r_g = -0.39$ ) -- COVID-19 (release 6)

141 2. Cheese intake ( $r_g = -0.36$ ) -- COVID-19 (release 4)

- 142 3. Education years ( $r_g = -0.46$ ) -- COVID-19 (release 6)
- 143 4. Education years ( $r_g = -0.32$ ) -- COVID-19 (release 4)
- 144 5. Verbal reasoning ( $r_g = -0.49$ ) -- COVID-19 (release 6)
- 145 6. Verbal reasoning ( $r_g = -0.28$ ) -- COVID-19 (release 4)
- 146 7. Healthspan ( $r_g = -0.41$ ) -- COVID-19 (release 6)
- 147 8. Healthspan ( $r_g = -0.25$ ) -- COVID-19 (release 4)
- 148 9. Breastfed as baby ( $r_g = -0.24$ ) -- COVID-19 (release 6)
- 149 10. Lifespan ( $r_g = -0.30$ ) -- COVID-19 (release 6)
- 150 11. Average income ( $r_g = -0.21$ ) -- COVID-19 (release 6)

151 Notably, ASB and COVID-19 were both positively genetically correlated with having a noisy  
152 workplace, doing heavy manual labor, COPD, and genitourinary diseases. They were both inversely  
153 genetically correlated with average income, education years, healthspan, verbal reasoning, lifespan,  
154 cheese intake, and being breastfed as a baby. The  $r_{gs}$  between COVID-19 and the non-ASB traits are  
155 presented in **Figure 2** and **Table 3** along with confidence intervals and  $h_g^2$  estimates.

## 156 **Discussion**

157 In support of prior observational findings by O'Connell *et al.* (2021)<sup>5</sup>, Carvalho and Machado  
158 (2020)<sup>3</sup>, Miguel *et al.* (2021)<sup>4</sup>, and Nivette *et al.* (2020)<sup>6</sup>, the positive  $r_g$  between ASB and COVID-19  
159 suggests that those with antisocial tendencies are more likely to be exposed to SARS-CoV-2 than those  
160 who do not engage in ASB. Although ASB is generally associated with impulsive and risk-taking  
161 proclivities, the  $r_g$  between COVID-19 and risk tolerance was null in our study, a result that argues  
162 against a propensity for risk-taking behavior underlying the link between ASB and exposure to SARS-  
163 CoV-2. The totality of our data instead suggests that a broad architecture of factors predispose some to

164 both ASB and COVID-19. Traits, for example, that are positively genetically correlated with both ASB  
165 and COVID-19—having a noisy workplace, doing heavy manual labor, and having COPD—are also  
166 strongly inversely genetically correlated with education years, verbal reasoning, and average income.

167 We observed positive  $r_{gs}$  between ASB and the psychiatric and violence-related traits we  
168 measured. But none of these traits were genetically correlated with COVID-19. That they were not  
169 comports with a meta-analytic review of mood disorders and risk for COVID-19 in 91 million  
170 individuals<sup>17</sup>. Namely, Ceban *et al.* (2021) found no association between pre-existing mood disorders  
171 and COVID-19<sup>17</sup>. Thus, the link between ASB and COVID-19 is unlikely to be due to those engaging  
172 in ASB having comorbid mood disorders.

173 We note that the strength of the  $r_g$  for ASB and COVID-19 dropped from 0.51 (release 4) to  
174 0.35 (release 6). Earlier GWA study releases by the COVID-19 Host Genetics Initiative capture data  
175 from earlier timepoints in the pandemic—release 4 being earlier (October 20, 2020) than release 6  
176 (June 15, 2021). This may be important since release 4 occurred before vaccines against SARS-CoV-2  
177 were available, and by June 15, 2021, 47% of those eligible for vaccination had completed an initial  
178 protocol for full vaccination in the U.S.<sup>18</sup>. Also, both releases 4 and 6 occurred prior to the appearance  
179 of the more transmissible Omicron (B.1.1.529) variant, which most on the planet are expected to  
180 encounter eventually<sup>19,20</sup>. Thus, our results seem to reflect an increased risk of exposure to SARS-  
181 CoV-2 early in the pandemic for those prone to ASB. If those with antisocial tendencies  
182 disproportionately refuse vaccination against SARS-CoV-2, however, the impact of ASB over time  
183 may have shifted from who gets exposed to SARS-CoV-2 to who gets severe disease.

184 Our study has limitations, which must also be considered. First is that the  $h_g^2$  estimates for both  
185 measures of COVID-19, while  $>0$ , were very small. This indicates that, based on the GWA results,  
186 SNPs can only explain a very small proportion of the individual differences in risk for COVID-19.



187 Hence, although the  $r_{gs}$  between ASB and COVID-19 were considerable, in absolute terms the genetic  
188 variance that is overlapping between the two traits is low. Second is that  $r_{gs}$ , while robust against most  
189 environmental confounders, can still suffer from genetic sources of confounding (i.e., even with  $r_{gs}$ , as  
190 we mentioned above, correlation is not necessarily causation). To illustrate, it seems unintuitive and  
191 unlikely that not being breastfed as a baby and eating less cheese cause ASB. One should, for  
192 somewhat obvious reasons, be similarly cautioned against the conclusion that being breastfed as a baby  
193 and eating more cheese protect against COVID-19, despite the apparent  $r_{gs}$ . Indeed, we chose these  
194 dietary traits to communicate the point that the shared genetic architecture that these have with  
195 education years, verbal reasoning, and average income seem the more plausibly causal phenomenon.  
196 Third, supposing that some of the  $r_{gs}$  represent causal linkages in some way, we nonetheless cannot  
197 determine the direction of causality with  $r_{gs}$  alone. For much of the discussion above, we tacitly  
198 presumed plausible directions of effect (e.g., ASB causing exposure to SARS-CoV-2 and, thus,  
199 COVID-19 versus COVID-19 causing ASB). But with all the traits in our matrix, the prevailing  
200 direction of effect could be the opposite and/or some level of bi-directional causation may exist<sup>16,21–23</sup>.  
201 And, as alluded to by “shared genetic architecture,” the correlated traits could be tagging a latent  
202 causal factor. These uncertainties are avenues for future research. Future studies could use either latent  
203 causal variable (LCV)<sup>22</sup> models to infer causality between traits or perform bi-directional MR, an  
204 instrumental variables technique, for which both directions of effect are probed. Regarding MR, few  
205 genome-wide significant signals have been found for ASB, and using SNPs weakly associated with  
206 ASB as instrumental variables would violate the assumptions necessary to perform MR. But assuming  
207 SNPs strongly associated with ASB are eventually found, bi-directional MR can be used to decipher  
208 the prevailing directions of effect between ASB and traits with which it’s associated. A fourth  
209 limitation is that our findings are limited to those of European ancestry. The limitations

210 notwithstanding,  $r_{gs}$  obtained from LDSC are not affected by sample overlap (i.e., participants being in  
211 both GWA studies for which the  $r_{gs}$  were calculated)<sup>16</sup>. This is a strength of study, which enabled us to  
212 capitalize on the power of large, population-based cohorts and publicly available GWA studies to  
213 probe timely questions. Finally, working to understand the etiology of ASB gets us closer to thinking  
214 about strategies to provide relief to a large part of the global population—both those engaged in ASB  
215 and those devastated by it.

## 216 Acknowledgements

217 We thank the consortia that made their GWA studies public.

## 218 Conflicts of Interest

219 The authors declare no conflicts of interest.

## 220 References

- 221 1 Cohen MA. *The Costs of Crime and Justice*. 2nd edition. Routledge: New York, New York,  
222 2020.
- 223 2 Koegl CJ, Farrington DP. Estimating the monetary cost of risk factors for crime in boys using  
224 the EARL-20B. *Psychol Serv* 2019; **18**: 441–453.
- 225 3 Carvalho L de F, Machado GM. Differences in adherence to COVID-19 pandemic containment  
226 measures: psychopathy traits, empathy, and sex. *Trends Psychiatry Psychother* 2020; **42**: 389–  
227 392.
- 228 4 Miguel FK, Machado GM, Pianowski G, Carvalho L de F. Compliance with containment  
229 measures to the COVID-19 pandemic over time: Do antisocial traits matter? *Pers Individ Dif*  
230 2021; **168**. doi:10.1016/j.paid.2020.110346.
- 231 5 O’Connell K, Berluti K, Rhoads SA, Marsh AA. Reduced social distancing early in the COVID-  
232 19 pandemic is associated with antisocial behaviors in an online United States sample. *PLoS*  
233 *ONE* 2021; **16**. doi:10.1371/journal.pone.0244974.
- 234 6 Nivette A, Ribeaud D, Murray A, Steinhoff A, Bechtiger L, Hepp U *et al*. Non-compliance with  
235 COVID-19-related public health measures among young adults in Switzerland: insights from a  
236 longitudinal cohort study. *Soc Sci Med* 2021; **268**. doi:10.1016/j.socscimed.2020.113370.
- 237 7 Burt SA. Are there meaningful etiological differences within antisocial behavior? Results of a  
238 meta-analysis. *Clin Psychol Rev* 2009; **29**: 163–178.
- 239 8 Polderman TJC, Benyamin B, de Leeuw CA, Sullivan PF, van Bochoven A, Visscher PM *et al*.  
240 Meta-analysis of the heritability of human traits based on fifty years of twin studies. *Nat Genet*  
241 2015; **47**: 702–709.
- 242 9 Rhee SH, Waldman ID. Genetic and environmental influences on antisocial behavior: a meta-  
243 analysis of twin and adoption studies. *Psychol Bull* 2002; **128**: 490–529.

- 244 10 Tielbeek JJ, Barnes JC, Popma A, Polderman TJC, Lee JJ, Perry JRB *et al.* Exploring the  
245 genetic correlations of antisocial behaviour and life history traits. *BJPsych Open* 2018; **4**: 467–  
246 470.
- 247 11 Ip HF, van der Laan CM, Krapohl EML, Brikell I, Sánchez-Mora C, Nolte IM *et al.* Genetic  
248 association study of childhood aggression across raters, instruments, and age. *Transl Psychiatry*  
249 2021; **11**. doi:10.1038/s41398-021-01480-x.
- 250 12 Tielbeek JJ, Johansson A, Polderman TJC, Rautiainen MR, Jansen P, Taylor M *et al.* Genome-  
251 wide association studies of a broad spectrum of antisocial behavior. *JAMA Psychiatry* 2017; **74**:  
252 1242–1250.
- 253 13 Massoglia M, Pridemore WA. Incarceration and health. *Annu Rev Sociol* 2015; **41**: 291–310.
- 254 14 Vaughn MG, Salas-Wright CP, Delisi M, Maynard BR, Boutwell B. Prevalence and correlates  
255 of psychiatric disorders among former juvenile detainees in the United States. *Compr Psychiatry*  
256 2015; **59**: 107–116.
- 257 15 Tielbeek JJ, Boutwell BB. Exploring the genomic architectures of health, physical traits and  
258 antisocial behavioral outcomes: a brief report. *Front Psychiatry* 2020; **11**.  
259 doi:10.3389/fpsyt.2020.00539.
- 260 16 Bulik-Sullivan B, Finucane HK, Anttila V, Gusev A, Day FR, Loh PR *et al.* An atlas of genetic  
261 correlations across human diseases and traits. *Nat Genet* 2015; **47**: 1236–1241.
- 262 17 Ceban F, Nogo D, Carvalho IP, Lee Y, Nasri F, Xiong J *et al.* Association between mood  
263 disorders and risk of COVID-19 infection, hospitalization, and death: a systematic review and  
264 meta-analysis. *JAMA Psychiatry* 2021. doi:10.1001/jamapsychiatry.2021.1818.
- 265 18 Mathieu E, Ritchie H, Ortiz-Ospina E, Roser M, Hasell J, Appel C *et al.* A global database of  
266 COVID-19 vaccinations. *Nat Hum Behav* 2021; **5**: 947–953.
- 267 19 Dejnirattisai W, Huo J, Zhou D, Zahradník J, Supasa P, Liu C *et al.* SARS-CoV-2 Omicron-  
268 B.1.1.529 leads to widespread escape from neutralizing antibody responses. *Cell* 2022; **185**:  
269 467-484.e15.
- 270 20 Aubrey A, Shapior A, Janse AM, Dorning C. Public health experts say most of us will get  
271 COVID-19. What does that mean? All Things Considered. NPR.  
272 2022. [https://www.npr.org/2022/01/12/1072548446/public-health-experts-say-most-of-us-will-](https://www.npr.org/2022/01/12/1072548446/public-health-experts-say-most-of-us-will-get-covid-19-what-does-that-mean)  
273 [get-covid-19-what-does-that-mean](https://www.npr.org/2022/01/12/1072548446/public-health-experts-say-most-of-us-will-get-covid-19-what-does-that-mean) (accessed 19 Feb2022).
- 274 21 Hemani G, Bowden J, Davey Smith G. Evaluating the potential role of pleiotropy in Mendelian  
275 randomization studies. *Human Mol Genet* 2018; **27**: R195–R208.
- 276 22 O’Connor LJ, Price AL. Distinguishing genetic correlation from causation across 52 diseases  
277 and complex traits. *Nat Genet* 2018; **50**: 1728–1734.
- 278 23 Pickrell JK, Berisa T, Liu JZ, Ségurel L, Tung JY, Hinds DA. Detection and interpretation of  
279 shared genetic influences on 42 human traits. *Nat Genet* 2016; **48**: 709–717.
- 280 24 Hemani G, Zheng J, Elsworth B, Wade KH, Haberland V, Baird D *et al.* The MR-Base platform  
281 supports systematic causal inference across the human phenome. *eLife* 2018; **30**: e34408.
- 282 25 Lyon M, Andrews S, Elsworth B, Gaunt T, Hemani G, Marcora E. The variant call format  
283 provides efficient and robust storage of GWAS summary statistics. *bioRxiv* 2020.  
284 doi:10.1101/2020.05.29.115824.
- 285 26 Elsworth B, Lyon M, Alexander T, Liu Y, Matthews P, Hallett J *et al.* The MRC IEU  
286 OpenGWAS data infrastructure. *bioRxiv* 2020. doi:10.1101/2020.08.10.244293.
- 287 27 Okbay A, Beauchamp JP, Fontana MA, Lee JJ, Pers TH, Rietveld CA *et al.* Genome-wide  
288 association study identifies 74 loci associated with educational attainment. *Nature* 2016; **533**:  
289 539–542.

- 290 28 Karlsson Linnér R, Biroli P, Kong E, Meddens SFW, Wedow R, Fontana MA *et al.* Genome-  
291 wide association analyses of risk tolerance and risky behaviors in over 1 million individuals  
292 identify hundreds of loci and shared genetic influences. *Nat Genet* 2019; **51**: 245–257.  
293 29 Zenin A, Tsepilov Y, Sharapov S, Getmantsev E, Menshikov LI, Fedichev PO *et al.*  
294 Identification of 12 genetic loci associated with human healthspan. *Commun Biol* 2019; **2**.  
295 doi:10.1038/s42003-019-0290-0.  
296 30 Timmers PR, Mounier N, Lall K, Fischer K, Ning Z, Feng X *et al.* Genomics of 1 million parent  
297 lifespans implicates novel pathways and common diseases and distinguishes survival chances.  
298 *eLife* 2019; **15**. doi:10.7554/eLife.39856.001.  
299 31 Nalls MA, Blauwendraat C, Vallerga CL, Heilbron K, Bandres-Ciga S, Chang D *et al.*  
300 Identification of novel risk loci, causal insights, and heritable risk for Parkinson’s disease: a  
301 meta-analysis of genome-wide association studies. *Lancet Neurol* 2019; **18**: 1091–1102.  
302 32 COVID-19 Host Genetics Initiative. Mapping the human genetic architecture of COVID-19.  
303 *Nature* 2021. doi:10.1038/s41586-021-03767-x.  
304 33 Tielbeek JJ, Uffelmann E, Williams BS, Colodro-Conde L, Gagnon É, Mallard TT *et al.*  
305 Uncovering the genetic architecture of broad antisocial behavior through a genome-wide  
306 association study meta-analysis. *bioRxiv* 2021. doi:10.1101/2021.10.19.462578.  
307

308

309

310

311

312

313

314

315

316

317

318

319

320

321

322 **Table 1.** GWA study data sources.

| <b>Trait (abbreviation)</b>                                       | <b>Data source: Consortium and Availability</b>                                                                                                                                                                                                     | <b>Effective Sample Size</b>                                                 |
|-------------------------------------------------------------------|-----------------------------------------------------------------------------------------------------------------------------------------------------------------------------------------------------------------------------------------------------|------------------------------------------------------------------------------|
| Average total household income before tax (“average income”)      | MRC-IEU; IEU Open GWAS Project identifier: ukb-b-7408; <a href="https://gwas.mrcieu.ac.uk/datasets/">https://gwas.mrcieu.ac.uk/datasets/</a> <sup>24-26</sup>                                                                                       | 397,751                                                                      |
| Education years                                                   | Okbay <i>et al.</i> (2016) <sup>27</sup> ; Social Science Genetic Association Consortium (SSGAC); <a href="https://www.thessgac.org/">https://www.thessgac.org/</a> <sup>28</sup>                                                                   | 293,723                                                                      |
| Healthspan                                                        | Zenin <i>et al.</i> (2019) <sup>29</sup> ; (UKBB; n=300,447 European); <a href="https://www.gwasarchive.org/">https://www.gwasarchive.org/</a>                                                                                                      | 300,447                                                                      |
| Lifespan                                                          | Timmers <i>et al.</i> <sup>30</sup> (2019); UKBB/LifeGen study; <a href="https://datashare.ed.ac.uk/handle/10283/3209">https://datashare.ed.ac.uk/handle/10283/3209</a>                                                                             | 1,012,240                                                                    |
| Word interpolation (“verbal reasoning”)                           | UKBB/Neale lab; IEU Open GWAS Project identifier: ukb-d-4957; <a href="https://gwas.mrcieu.ac.uk/datasets/">https://gwas.mrcieu.ac.uk/datasets/</a> <sup>24-26</sup>                                                                                | 98,753 cases and 18,062 controls                                             |
| Breastfed as baby                                                 | MRC-IEU; IEU Open GWAS Project identifier: ukb-b-13423; <a href="https://gwas.mrcieu.ac.uk/datasets/">https://gwas.mrcieu.ac.uk/datasets/</a> <sup>24-26</sup>                                                                                      | 251,150 cases and 100,944 controls                                           |
| Cheese intake                                                     | MRC-IEU; IEU Open GWAS Project identifier: ukb-b-1489; <a href="https://gwas.mrcieu.ac.uk/datasets/">https://gwas.mrcieu.ac.uk/datasets/</a> <sup>24-26</sup>                                                                                       | 451,486                                                                      |
| Self-rated happiness (“happiness”)                                | UKBB/Neale lab; IEU Open GWAS Project identifier: ukb-a-367; <a href="https://gwas.mrcieu.ac.uk/datasets/">https://gwas.mrcieu.ac.uk/datasets/</a> <sup>24-26</sup>                                                                                 | 110,935                                                                      |
| Parkinson's disease                                               | Nalls <i>et al.</i> (2019) <sup>31</sup> . International Parkinson's Disease Genomics Consortium; IEU Open GWAS Project identifier: ieu-b-7; <a href="https://gwas.mrcieu.ac.uk/datasets/">https://gwas.mrcieu.ac.uk/datasets/</a> <sup>24-26</sup> | 33,674 cases and 449,046 controls                                            |
| COVID-19                                                          | COVID-19 Host Genetics Initiative, release 4 <sup>32</sup> ; IEU Open GWAS Project identifier: ebi-a-GCST010780; <a href="https://gwas.mrcieu.ac.uk/datasets/">https://gwas.mrcieu.ac.uk/datasets/</a> <sup>24-26</sup>                             | 14,134 COVID-19 cases and 1,284,876 controls (release 4)<br>SNPs=12,500,447  |
| COVID-19                                                          | COVID-19 Host Genetics Initiative, release 6 <sup>32</sup> <a href="https://www.covid19hg.org/results/r6/">https://www.covid19hg.org/results/r6/</a>                                                                                                | 112,612 COVID-19 cases and 2,474,079 controls (release 6)<br>SNPs= 8,141,092 |
| Job involves heavy manual or physical work (“heavy manual labor”) | MRC-IEU; IEU Open GWAS Project identifier: ukb-b-2002; <a href="https://gwas.mrcieu.ac.uk/datasets/">https://gwas.mrcieu.ac.uk/datasets/</a> <sup>24-26</sup>                                                                                       | 263,615                                                                      |
| Noisy workplace                                                   | MRC-IEU; IEU Open GWAS Project identifier: ukb-b-2091; <a href="https://gwas.mrcieu.ac.uk/datasets/">https://gwas.mrcieu.ac.uk/datasets/</a> <sup>24-26</sup>                                                                                       | 151,624                                                                      |
| ASB                                                               | Broad Antisocial Behavior Consortium (BroadABC); <a href="http://broadabc.ctglab.nl/">http://broadabc.ctglab.nl/</a> (data available upon request) <sup>12,33</sup>                                                                                 | 56,575                                                                       |
| Townsend Deprivation Index                                        | MRC-IEU; IEU Open GWAS Project identifier: ukb-b-10011; <a href="https://gwas.mrcieu.ac.uk/datasets/">https://gwas.mrcieu.ac.uk/datasets/</a> <sup>24-26</sup>                                                                                      | 462,464                                                                      |
| Gastrointestinal diseases                                         | FINNGen Biobank analysis; 39,639 cases and 56,860 controls (European); binary; IEU Open                                                                                                                                                             | 39,639 cases and 56,860 controls                                             |

|                                                                                        |                                                                                                                                                                                      |                                    |
|----------------------------------------------------------------------------------------|--------------------------------------------------------------------------------------------------------------------------------------------------------------------------------------|------------------------------------|
|                                                                                        | GWAS Project identifier: finn-a-K11_GIDISEASES;<br><a href="https://www.finngen.fi/fi/">https://www.finngen.fi/fi/</a> <sup>24-26</sup>                                              |                                    |
| Chronic obstructive pulmonary disease (COPD) differential diagnosis                    | UKBB/Neale lab; IEU Open GWAS Project identifier: ukb-d-COPD_EXCL;<br><a href="https://gwas.mrcieu.ac.uk/datasets/">https://gwas.mrcieu.ac.uk/datasets/</a> <sup>24-26</sup>         | 26,710 cases and 334,484 controls  |
| Genitourinary diseases                                                                 | UKBB/Neale lab; IEU Open GWAS Project identifier: ukb-d-XIV_GENITOURINARY;<br><a href="https://gwas.mrcieu.ac.uk/datasets/">https://gwas.mrcieu.ac.uk/datasets/</a> <sup>24-26</sup> | 71,620 cases and 289,574 controls  |
| Neuroticism score (“neuroticism”)                                                      | MRC-IEU; IEU Open GWAS Project identifier: ukb-b-4630;<br><a href="https://gwas.mrcieu.ac.uk/datasets/">https://gwas.mrcieu.ac.uk/datasets/</a> <sup>24-26</sup>                     | 374,323                            |
| Seen doctor for nerves, anxiety, tension, or depression                                | MRC-IEU; IEU Open GWAS Project identifier: ukb-b-6991;<br><a href="https://gwas.mrcieu.ac.uk/datasets/">https://gwas.mrcieu.ac.uk/datasets/</a> <sup>24-26</sup>                     | 158,565 cases and 300,995 controls |
| Plays computer games                                                                   | MRC-IEU; IEU Open GWAS Project identifier: ukb-b-4779;<br><a href="https://gwas.mrcieu.ac.uk/datasets/">https://gwas.mrcieu.ac.uk/datasets/</a> <sup>24-26</sup>                     | 462,433                            |
| Victim of physically violent crime (“violent-crime victim”)                            | UKBB/Neale lab; IEU Open GWAS Project identifier: ukb-d-20529;<br><a href="https://gwas.mrcieu.ac.uk/datasets/">https://gwas.mrcieu.ac.uk/datasets/</a> <sup>24-26</sup>             | 21,926 cases and 95,920 controls   |
| Risk tolerance (self-rated: “Would you describe yourself as someone who takes risks?”) | Karlsson Linnér et al. (2019) <sup>28</sup> ; Social Science Genetic Association Consortium (SSGAC);<br><a href="https://www.thessgac.org/">https://www.thessgac.org/</a>            | 466,571                            |
| Witnessed sudden violent death (“saw sudden violent death”)                            | UKBB/Neale lab; IEU Open GWAS Project identifier: ukb-d-20530;<br><a href="https://gwas.mrcieu.ac.uk/datasets/">https://gwas.mrcieu.ac.uk/datasets/</a> <sup>24-26</sup>             | 15,959 cases and 101,903 controls  |

323 UKBB = UK Biobank; IEU = Medical Research Council Integrative Epidemiology Unit at the  
324 University of Bristol; GWAS = genome-wide association study. Most of the GWA studies were  
325 performed solely in those of European ancestry. The two COVID-19 GWA studies came from meta-  
326 analyses that predominately consisted of those of European ancestry, but the COVID-19 (release 6)  
327 included some participants of other ancestral backgrounds. However, the COVID-19 Host Genetics  
328 Initiative cohort that generated the COVID-19 data performed sensitivity analyses generating SNP-  
329 heritability ( $h_g^2$ ) estimates for COVID-19 using only the data for those of European ancestry for release  
330 6 and compared these to the  $h_g^2$  estimates for the meta-analytic measures we used: the  $h_g^2$  estimates  
331 were nearly the same (see the Supplementary table 6 that accompanies the COVID-19 Host Genetics  
332 Initiative paper<sup>32</sup>). Were the  $h_g^2$  estimates substantially different, use of the meta-analytic data for  
333 LDSC would have been inappropriate. Thus, though we did not have access to the European-only

334 ancestry data for COVID-19 (release 6), the  $h_g^2$  estimates for the meta-analytic data do not appear to be  
335 confounded by mixed ancestries.

336

337

338

339

340

341

342

343

344

345

346

347

348

349

350

351

352

353

354

355

356

357 **Table 2.** Genetic correlations ( $r_{gs}$ ) between ASB and health and behavioral traits.

| Trait 1 | Trait 2                                                 | $r_g$ | Lower 95% CI for $r_g$ | Upper 95% CI for $r_g$ | FDR $P$ -value | $h_g^2$ for trait 2 |
|---------|---------------------------------------------------------|-------|------------------------|------------------------|----------------|---------------------|
| ASB     | Average income                                          | -0.54 | -0.65                  | -0.43                  | 9.88E-22       | 0.07                |
| ASB     | Education years                                         | -0.48 | -0.59                  | -0.38                  | 9.76E-20       | 0.12                |
| ASB     | Healthspan                                              | -0.47 | -0.62                  | -0.31                  | 5.97E-09       | 0.03                |
| ASB     | Verbal reasoning                                        | -0.44 | -0.58                  | -0.30                  | 5.62E-09       | 0.08                |
| ASB     | Lifespan                                                | -0.33 | -0.46                  | -0.21                  | 4.20E-07       | 0.02                |
| ASB     | Cheese intake                                           | -0.28 | -0.38                  | -0.18                  | 6.97E-08       | 0.07                |
| ASB     | Breastfed as baby                                       | -0.24 | -0.38                  | -0.11                  | 9.60E-04       | 0.03                |
| ASB     | Happiness                                               | -0.10 | -0.25                  | 0.05                   | 2.22E-01       | 0.06                |
| ASB     | Parkinson's disease                                     | -0.04 | -0.26                  | 0.18                   | 7.77E-01       | 0.02                |
| ASB     | Plays computer games                                    | 0.15  | 0.06                   | 0.25                   | 3.60E-03       | 0.07                |
| ASB     | Neuroticism                                             | 0.29  | 0.20                   | 0.38                   | 3.05E-10       | 0.11                |
| ASB     | COVID-19 (release 6)                                    | 0.35  | 0.02                   | 0.68                   | 5.21E-02       | 0.001               |
| ASB     | Violent-crime victim                                    | 0.36  | 0.16                   | 0.56                   | 5.82E-04       | 0.03                |
| ASB     | Genitourinary diseases                                  | 0.38  | 0.22                   | 0.55                   | 1.45E-05       | 0.02                |
| ASB     | Saw sudden violent death                                | 0.42  | 0.20                   | 0.65                   | 3.95E-04       | 0.02                |
| ASB     | Seen doctor for nerves, anxiety, tension, or depression | 0.42  | 0.31                   | 0.54                   | 2.36E-13       | 0.06                |
| ASB     | Gastrointestinal diseases                               | 0.46  | 0.23                   | 0.70                   | 1.89E-04       | 0.04                |
| ASB     | Risk tolerance                                          | 0.50  | 0.39                   | 0.60                   | 6.34E-20       | 0.02                |
| ASB     | COPD                                                    | 0.51  | 0.33                   | 0.68                   | 6.45E-08       | 0.01                |
| ASB     | COVID-19 (release 4)                                    | 0.51  | 0.12                   | 0.90                   | 1.54E-02       | 0.001               |
| ASB     | Heavy manual labor                                      | 0.58  | 0.45                   | 0.70                   | 8.31E-19       | 0.08                |
| ASB     | Noisy workplace                                         | 0.63  | 0.48                   | 0.77                   | 3.99E-16       | 0.06                |
| ASB     | Townsend Deprivation Index                              | 0.70  | 0.56                   | 0.84                   | 2.25E-22       | 0.03                |

358 ASB=antisocial behavior;  $r_g$  = genetic correlation; FDR = false-discovery rate (corrected)  $P$ -value;  $h_g^2$

359 = SNP-heritability.

360

361

362

363

364

365

366

367

368



369 **Table 3.** Genetic correlations ( $r_{gs}$ ) between COVID-19 and health and behavioral traits.

| Trait 1              | Trait 2                                                 | $r_g$ | Lower 95% CI for $r_g$ | Upper 95% CI for $r_g$ | FDR $P$ -value | $h_g^2$ for trait 2 |
|----------------------|---------------------------------------------------------|-------|------------------------|------------------------|----------------|---------------------|
| COVID-19 (release 6) | Chronic obstructive pulmonary disease                   | 0.40  | 0.11                   | 0.70                   | 1.17E-02       | 0.02                |
| COVID-19 (release 6) | Heavy manual labor                                      | 0.38  | 0.19                   | 0.56                   | 1.25E-04       | 0.08                |
| COVID-19 (release 4) | Chronic obstructive pulmonary disease                   | 0.33  | 0.04                   | 0.61                   | 3.44E-02       | 0.01                |
| COVID-19 (release 6) | Genitourinary diseases                                  | 0.32  | 0.04                   | 0.60                   | 3.69E-02       | 0.02                |
| COVID-19 (release 6) | Noisy workplace                                         | 0.28  | 0.07                   | 0.50                   | 1.45E-02       | 0.06                |
| COVID-19 (release 4) | Noisy workplace                                         | 0.26  | 0.03                   | 0.49                   | 3.69E-02       | 0.06                |
| COVID-19 (release 6) | Saw sudden violent death                                | 0.25  | -0.08                  | 0.58                   | 1.70E-01       | 0.03                |
| COVID-19 (release 6) | Violent-crime victim                                    | 0.23  | -0.09                  | 0.55                   | 1.97E-01       | 0.03                |
| COVID-19 (release 4) | Genitourinary diseases                                  | 0.21  | -0.03                  | 0.45                   | 1.17E-01       | 0.02                |
| COVID-19 (release 4) | Heavy manual labor                                      | 0.20  | 0.03                   | 0.37                   | 2.65E-02       | 0.08                |
| COVID-19 (release 6) | Gastrointestinal diseases                               | 0.20  | -0.10                  | 0.49                   | 2.36E-01       | 0.05                |
| COVID-19 (release 6) | Townsend Deprivation Index                              | 0.18  | -0.05                  | 0.41                   | 1.66E-01       | 0.03                |
| COVID-19 (release 6) | Risk tolerance                                          | 0.14  | -0.03                  | 0.31                   | 1.31E-01       | 0.02                |
| COVID-19 (release 4) | Townsend Deprivation Index                              | 0.08  | -0.11                  | 0.27                   | 4.81E-01       | 0.03                |
| COVID-19 (release 4) | Risk tolerance                                          | 0.07  | -0.10                  | 0.24                   | 4.97E-01       | 0.02                |
| COVID-19 (release 4) | Happiness                                               | 0.06  | -0.19                  | 0.30                   | 7.07E-01       | 0.06                |
| COVID-19 (release 6) | Seen doctor for nerves, anxiety, tension, or depression | 0.05  | -0.09                  | 0.18                   | 5.40E-01       | 0.06                |
| COVID-19 (release 4) | Seen doctor for nerves, anxiety, tension, or depression | 0.03  | -0.11                  | 0.17                   | 7.22E-01       | 0.06                |
| COVID-19 (release 6) | Happiness                                               | 0.03  | -0.21                  | 0.27                   | 8.38E-01       | 0.06                |
| COVID-19 (release 4) | Parkinson's disease                                     | 0.01  | -0.26                  | 0.27                   | 9.59E-01       | 0.02                |
| COVID-19 (release 4) | Plays computer games                                    | -0.03 | -0.17                  | 0.11                   | 7.19E-01       | 0.07                |
| COVID-19 (release 6) | Plays computer games                                    | -0.04 | -0.17                  | 0.09                   | 6.23E-01       | 0.08                |
| COVID-19 (release 6) | Neuroticism                                             | -0.04 | -0.16                  | 0.08                   | 5.25E-01       | 0.11                |
| COVID-19 (release 6) | Parkinson's disease                                     | -0.06 | -0.28                  | 0.16                   | 6.61E-01       | 0.02                |
| COVID-19 (release 4) | Gastrointestinal diseases                               | -0.08 | -0.39                  | 0.24                   | 7.06E-01       | 0.04                |
| COVID-19 (release 4) | Neuroticism                                             | -0.09 | -0.26                  | 0.08                   | 3.68E-01       | 0.11                |
| COVID-19 (release 4) | Average income                                          | -0.16 | -0.32                  | 0.00                   | 6.02E-02       | 0.07                |
| COVID-19 (release 4) | Lifespan                                                | -0.17 | -0.37                  | 0.04                   | 1.47E-01       | 0.02                |
| COVID-19 (release 4) | Breastfed as baby                                       | -0.17 | -0.41                  | 0.06                   | 1.93E-01       | 0.03                |
| COVID-19 (release 6) | Average income                                          | -0.21 | -0.37                  | -0.04                  | 2.06E-02       | 0.07                |
| COVID-19 (release 4) | Violent-crime victim                                    | -0.24 | -0.58                  | 0.11                   | 2.24E-01       | 0.03                |
| COVID-19 (release 6) | Breastfed as baby                                       | -0.24 | -0.46                  | -0.03                  | 3.69E-02       | 0.02                |
| COVID-19 (release 4) | Healthspan                                              | -0.25 | -0.45                  | -0.04                  | 2.53E-02       | 0.03                |
| COVID-19 (release 4) | Verbal reasoning                                        | -0.28 | -0.52                  | -0.03                  | 3.79E-02       | 0.08                |
| COVID-19 (release 6) | Lifespan                                                | -0.30 | -0.48                  | -0.11                  | 2.73E-03       | 0.02                |
| COVID-19 (release 4) | Saw sudden violent death                                | -0.30 | -0.68                  | 0.07                   | 1.50E-01       | 0.03                |
| COVID-19 (release 4) | Education years                                         | -0.32 | -0.48                  | -0.16                  | 1.39E-04       | 0.13                |
| COVID-19 (release 4) | Cheese intake                                           | -0.36 | -0.56                  | -0.16                  | 9.65E-04       | 0.07                |
| COVID-19 (release 6) | Cheese intake                                           | -0.39 | -0.59                  | -0.20                  | 1.88E-04       | 0.07                |
| COVID-19 (release 6) | Healthspan                                              | -0.41 | -0.62                  | -0.20                  | 2.23E-04       | 0.03                |
| COVID-19 (release 6) | Education years                                         | -0.46 | -0.66                  | -0.26                  | 1.09E-05       | 0.13                |
| COVID-19 (release 6) | Verbal reasoning                                        | -0.49 | -0.76                  | -0.22                  | 6.28E-04       | 0.09                |

370  $r_g$  = genetic correlation; FDR = false-discovery rate (corrected)  $P$ -value;  $h_g^2$  = SNP-heritability.

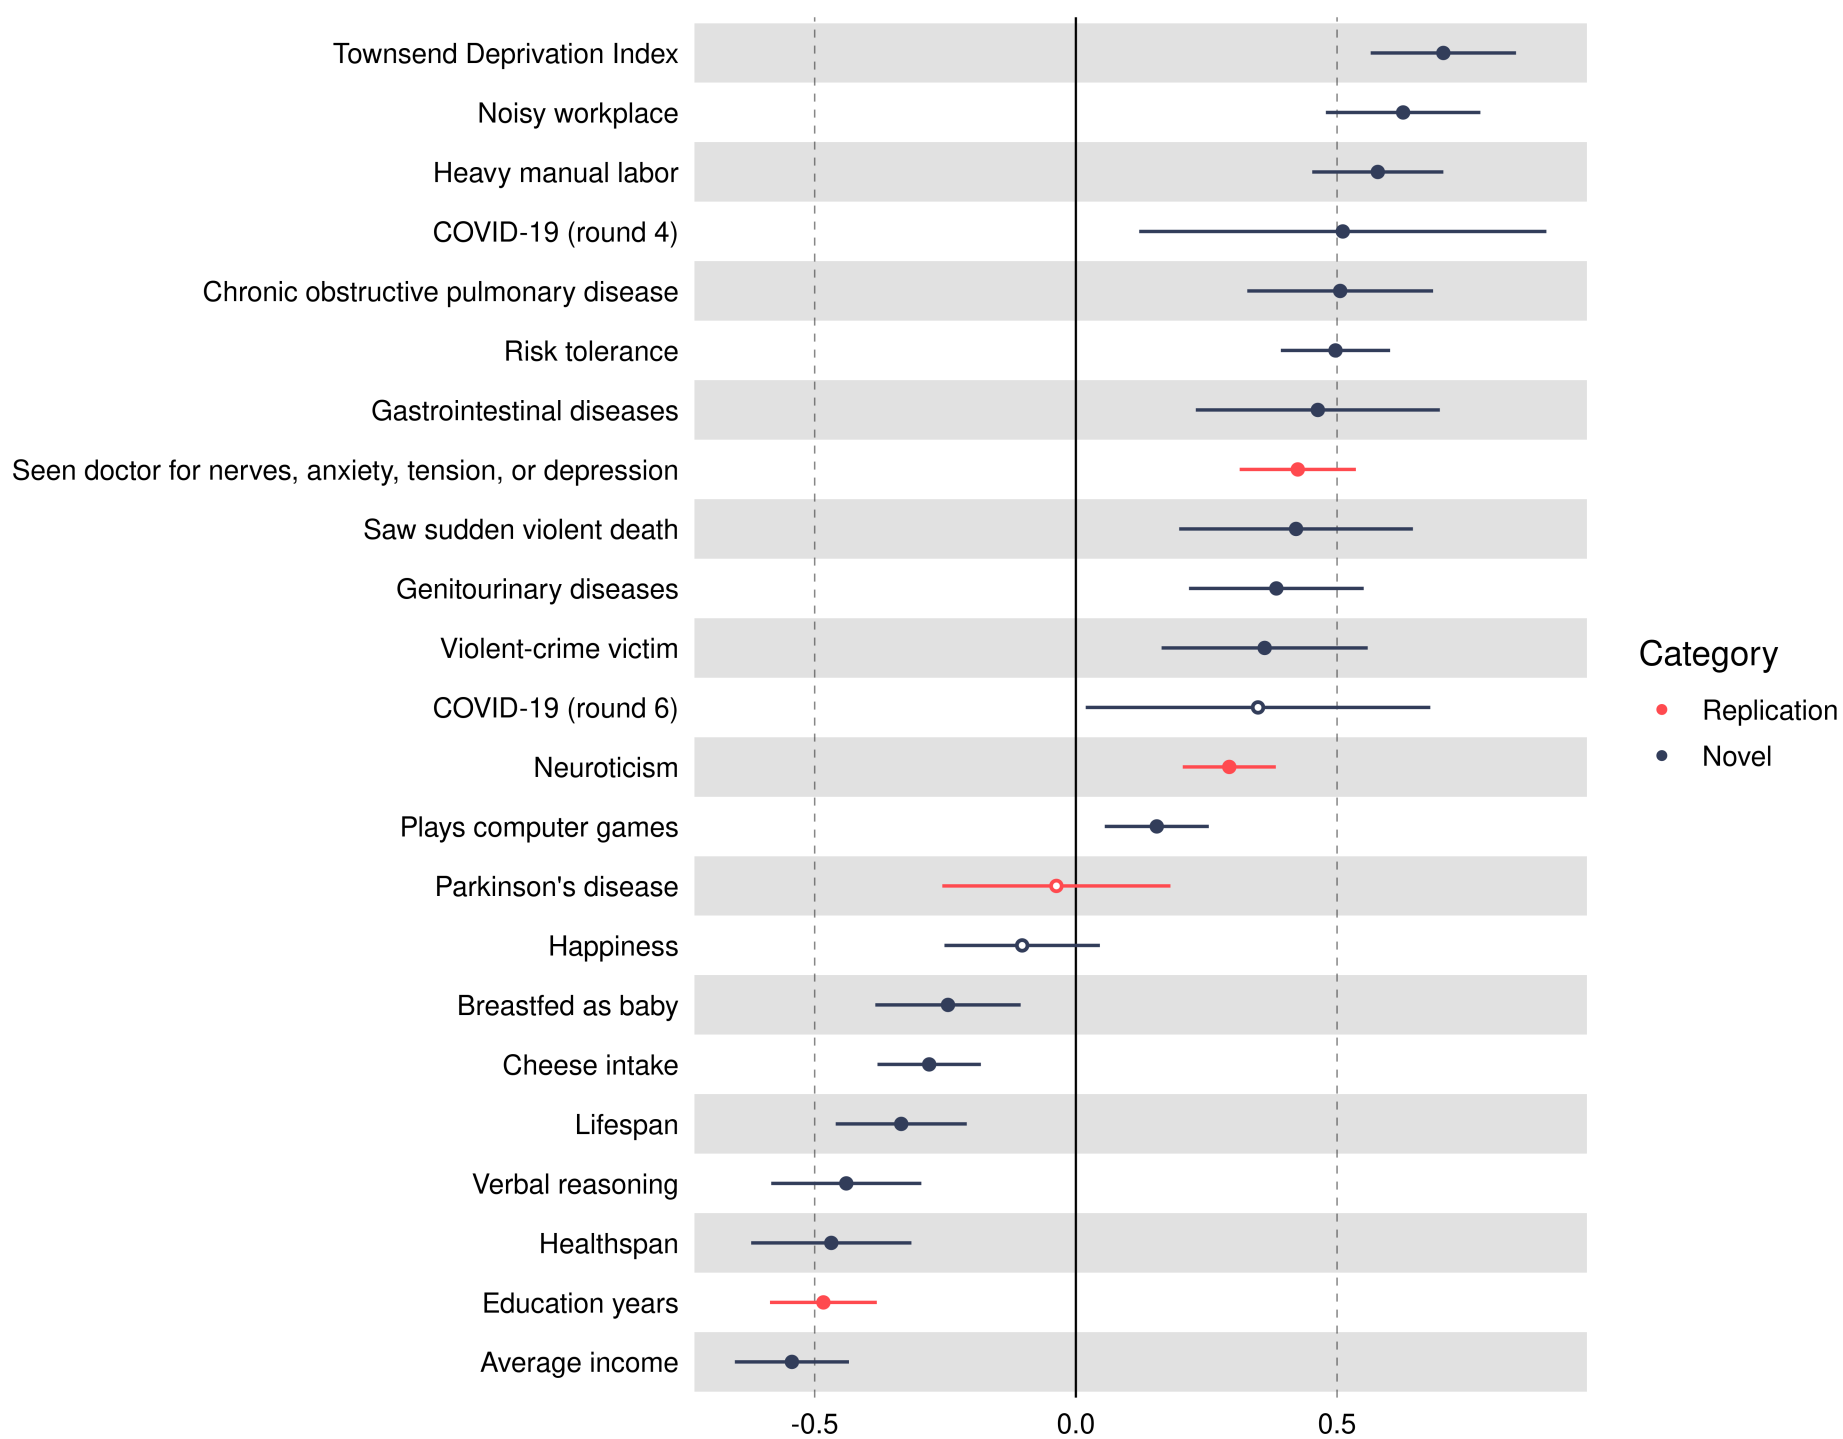

Genetic correlations (95% confidence intervals) for ASB and health and behavioral traits. Closed circles indicate false-discovery rate (corrected)  $P < 0.05$ .

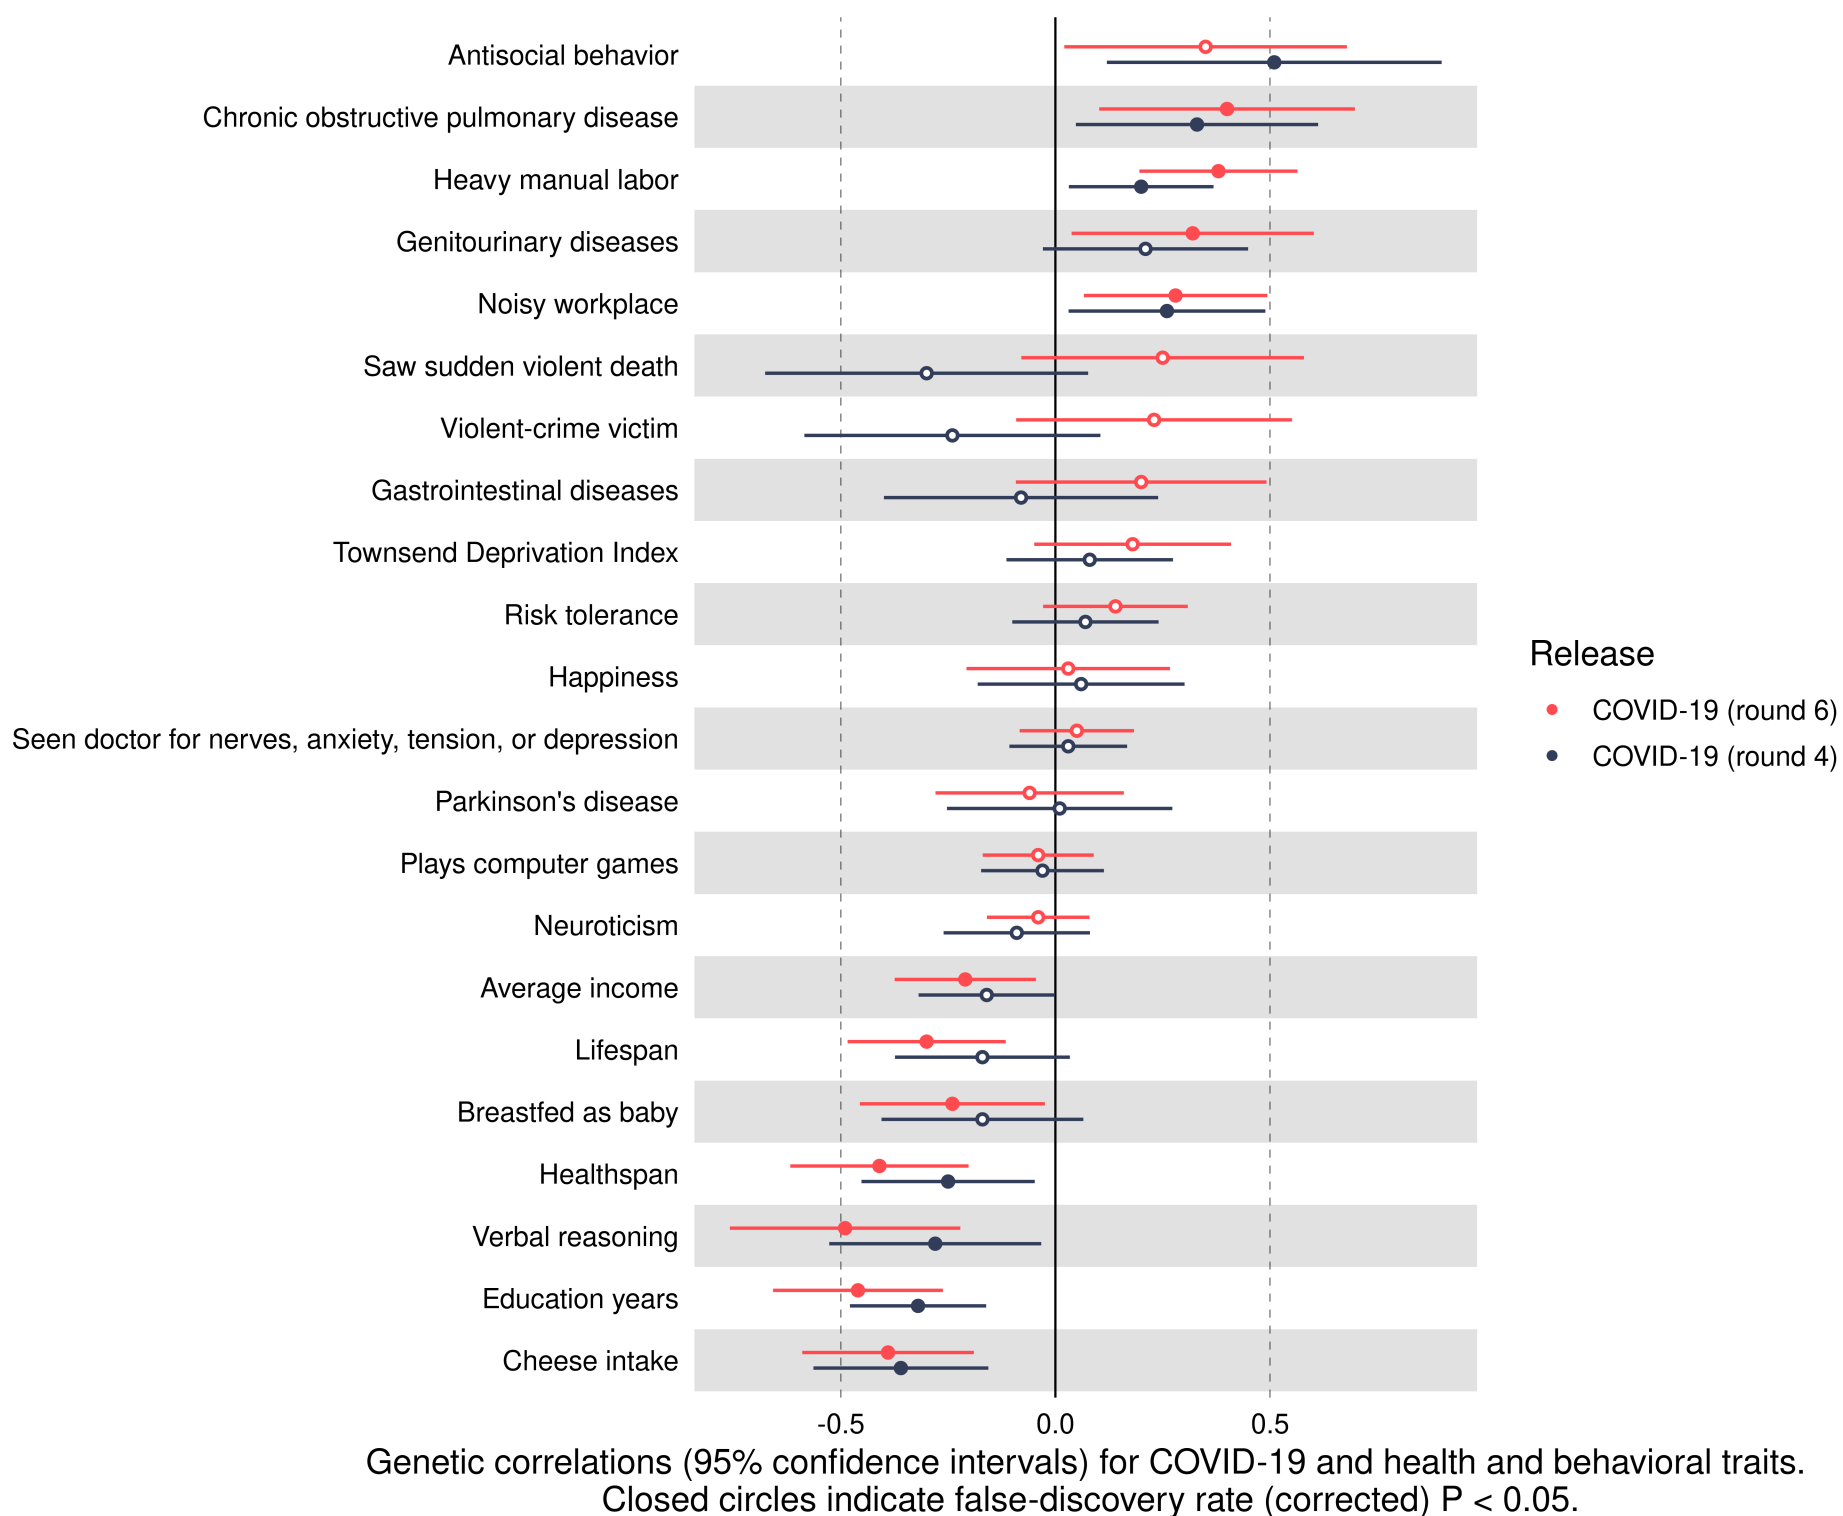

Source: https://medrxiv.org/content/10.1101/2021.10.18.21265145v2.full.pdf
